# Supplementary material
Source: ML conference proceedings conference paper supplement (https://proceedings.neurips.cc/paper_files/paper/2020/hash/a376802c0811f1b9088828288eb0d3f0-Abstract.html)
Supplement: Supplementary file [file a376802c0811f1b9088828288eb0d3f0-Supplemental.zip]

---

# Practical Low-Rank Communication Compression in Decentralized Deep Learning

---

Anonymous Author(s)

Affiliation

Address

email

## Abstract

1        Lossy gradient compression has become a practical tool to overcome the communi-  
2        cation bottleneck in centrally coordinated distributed training of machine learning  
3        models. However, algorithms for decentralized training with compressed commu-  
4        nication over arbitrary connected networks have been more complicated, requiring  
5        additional memory and hyperparameters. We introduce a simple algorithm that  
6        directly compresses the model differences between neighboring workers using low-  
7        rank linear compressors applied to model differences. Inspired by the PowerSGD  
8        algorithm for centralized deep learning (Vogels et al., 2019), this algorithm uses  
9        power iteration steps to maximize the information transferred per bit. We prove  
10       that our method requires no additional hyperparameters, converges faster than prior  
11       methods, and is asymptotically independent of both the network and the compres-  
12       sion. Out of the box, these compressors perform on par with state-of-the-art tuned  
13       compression algorithms in a series of deep learning benchmarks.

## 14    1 Introduction

15    The major advances in machine learning in the last decade have been made possible by very large  
16    datasets collected by multifaceted organizations. We live in a society where almost every individual  
17    owns electronic devices that collect huge amounts of data, which—when used collaboratively—could  
18    lead to transformative insights (Nedic, 2020). Often this data is bound to the device it is captured on.  
19    This might be for practical reasons of efficiency, or for more fundamental reasons such as privacy  
20    constraints. Centralized systems present a single point of failure both for data transfer, as well as for  
21    information security and privacy (Kairouz et al., 2019).

22    The paradigm of decentralized machine learning is key to leveraging the potential of this new kind of  
23    data. In this model, each connected device (node) has its own data. Each node can only communicate  
24    with few others, and together, the network of sparsely connected nodes aims to collaboratively train a  
25    model that minimizes a loss function on their joint dataset. The decentralized approach is not only  
26    useful in fundamentally decentralized systems, but the sparse communication patterns can sometimes  
27    even lead to efficiency gains in datacenter settings (Assran et al., 2019).

28    In bringing decentralized optimization algorithms into the realm of deep learning, the more-than  
29    gigabytes large model parameters and gradients (Rajbhandari et al., 2019; Brown et al., 2020) have  
30    spurred interest in communication compression techniques to reduce the bandwidth requirements of  
31    training such models. While practical plug-and-play compressors already exist for communication in  
32    centralized deep learning (Seide et al., 2014; Vogels et al., 2019) that can retain full model quality at  
33    significant communication reductions, current compression algorithms in decentralized optimization  
34    require the tuning of additional hyperparameters. This is unfortunate, since running many experiments  
35    to tune these hyperparameters is especially challenging and costly in a decentralized environment.

In this paper, we study a specific class of low-rank compressors for decentralized optimization inspired by (Vogels et al., 2019) that are reliable and require no tuning. Our low-rank compressor considers model parameters as matrices  $\mathbf{X}$ , and runs power iterations on the difference of two node’s parameters  $\mathbf{X}_i - \mathbf{X}_j$  to obtain a good low-rank approximation. Because these steps are linear, they can be executed in a distributed fashion, avoiding the expensive communication of full matrices.

We validate these plug-and-play compressors on decentralized image classification and language modeling tasks, and show that we can achieve competitive performance to other methods that require additionally tuned hyperparameters. This allows users to tune a learning rate in a simpler centralized setup, and then transition to decentralized learning without extra effort. We prove hyperparameter-free convergence on a subclass of random low-rank approximations. For consensus, our method converges faster than prior methods (Koloskova et al., 2019b). For stochastic optimization, our rates are asymptotically independent of the compression rate.

## 2 Related work

**Communication compression in centrally coordinated learning.** Communication compression is an established approach to alleviate the communication bottleneck in parallel optimization in deep learning. While Alistarh et al. (2017); Wen et al. (2017); Seide et al. (2014); Bernstein et al. (2019); Karimireddy et al. (2019b) study gradient quantization, it is also possible to only send gradient coordinates with the largest absolute values Lin et al. (2018); Stich et al. (2018); Wangni et al. (2018).

It has become clear that linear compression operators are practical in the centralized setting because they enable efficient all-reduce aggregation (Yu et al., 2018; Vogels et al., 2019; Cho et al., 2019). Ivkin et al. (2019) use linear sketches to detect which parameter coordinates change most in a distributed setting. Wang et al. (2018) observed that gradients in deep learning can be well approximated as low-rank matrices. The PowerSGD algorithm (Vogels et al., 2019), on which this work is based, is both linear and low-rank and performed well in a recent benchmark (Xu et al., 2020).

**Decentralized optimization.** Decentralized, or ‘gossip’-based, optimization has been studied for many years (Tsitsiklis, 1984). Popular methods include those based on (stochastic) subgradient descent (Nedic & Ozdaglar, 2009) on node’s local objective functions and with averaging between sparsely connected neighbors. Lian et al. (2017) evaluated the effectiveness of such schemes in the non-convex setting.

Tang et al. (2018) extend decentralized optimization with compressed communication, but require relatively high precision compression to ensure convergence. Koloskova et al. (2019a) and Tang et al. (2019) alleviate this constraint, supporting arbitrary-strength compression. Lu & Sa (2020) study a compression based on the assumption that model differences across connected nodes are coordinate-wise bounded. However, the abovementioned methods introduce additional hyperparameters specific to compression (e.g. the consensus stepsize)—an inconvenience we overcome in this work.

## 3 Decentralized machine learning

Decentralized multi-worker training of machine learning models has two key characteristics. Firstly, there is no central ‘master’ node and nodes can only communicate with a limited number of neighbors. This can either be a physical limitation of the network, or it can be desirable for performance. In a datacenter, sparse, decentralized connectivity leads to excellent scalability (Assran et al., 2019). The second characteristic is distributed data: each worker has their own data that potentially come from non-identical distributions. This can also be a hard limitation (e.g. to protect privacy), or it can be desirable for co-locality of computation and data.

The setup is formalized as follows:  $n$  worker nodes aim to collectively minimize a loss function

$$f(\mathbf{X}) := \frac{1}{n} \sum_{i=1}^n f_i(\mathbf{X}), \quad f_i(\mathbf{X}) := \mathbb{E}_{\boldsymbol{\xi}_i \sim D_i} F_i(\mathbf{X}, \boldsymbol{\xi}_i)$$

over model parameters  $\mathbf{X}$ , where  $f_i(\cdot)$  are smooth potentially non-convex loss functions over local data distributions  $D_i$ . We assume that  $\mathbf{X} \in \mathbb{R}^{p \times q}$  where  $p$  represents the size of the ‘input’ and  $q$  is the output size. For linear models, this matrix representation is natural. For multi-layer networks, each weight and bias is considered separately, and for convolutional layers,  $q$  represents the number of input layers and the kernel size and  $p$  is the number of output channels.

85 The network topology is represented by an undirected connected graph  $G$  that connects nodes  $i$   
 86 with their neighbors  $\mathcal{N}_i$  (including self-links). Communication between nodes  $i$  and  $j$  is typically  
 87 weighted by the  $i, j$ -th entry of a *mixing matrix*  $\mathbf{W} \in \mathbb{R}^{n,n}$  which is non-zero only for connected  
 88 nodes. This matrix is chosen such that for any scalars  $\mathbf{v} \in \mathbb{R}^n$  held by the nodes, repeated averaging  
 89 (gossip) between connected nodes,  $\mathbf{W}\mathbf{v}$ , gradually leads to consensus,  $\mathbf{v}_i \rightarrow \frac{1}{n} \sum_{i=1}^n \mathbf{v}_i \forall i$ .

90 In stochastic gradient-based optimization, each worker typically has its own model parameters  $\mathbf{X}_i$ .  
 91 Gossip averaging is used to bring the  $\mathbf{X}_i$ 's closer together and share information between nodes,  
 92 while local stochastic gradient updates change  $\mathbf{X}_i$  to fit local data. Our methods builds on the elegant  
 93 DP-SGD algorithm (Lian et al., 2017). In DP-SGD, for each timestep  $t$  and each worker  $i$ ,

$$\mathbf{X}_i^{(t+1)} := \mathbf{X}_i^{(t)} - \eta \nabla f_i(\mathbf{X}_i^{(t)}, \xi_{i,t}) + \sum_{j \in \mathcal{N}_i} W_{ij} (\mathbf{X}_j^{(t)} - \mathbf{X}_i^{(t)}), \quad (1)$$

94 where  $\eta_i$  is the learning rate and  $\xi_{i,t} \sim D_i$  represents a local data point. Note that each step requires  
 95 sending and receiving the full model parameters between all pairs of connected neighbors, but that  
 96 this communication can be overlapped with computation of the stochastic gradient.

## 97 4 Algorithm

98 Naively applying lossy communication compression (quantization / sparsification) to the gossip update  
 99 in Eq. (1) leads to non-convergence. To support arbitrary compression, prior approaches introduce  
 100 algorithmic modifications and additional hyperparameters to tune (Koloskova et al., 2019b; Tang et al.,  
 101 2019, 2018). In this section, we introduce PowerGossip, a compressed consensus algorithm based  
 102 on low-rank approximations and power iteration that does not suffer from these issues. Low-rank  
 103 decomposition has already been shown to perform well in centralized deep learning (Vogels et al.,  
 104 2019; Cho et al., 2019; Xu et al., 2020), and we find that they can be competitive with expensively  
 105 tuned quantization- or sparsification-based algorithms for decentralized training as well.

106 PowerGossip is based on the premise that  $\mathcal{C}_{\mathbf{v}}(\mathbf{X}) := (\mathbf{X}\mathbf{v})\mathbf{v}^\top$ , for a matrix  $\mathbf{X} \in \mathbb{R}^{p \times q}$  and vector  
 107  $\mathbf{v} \in \mathbb{R}^q$  with  $\|\mathbf{v}\|_2 = 1$ , can be a reasonable low-rank approximation of  $\mathbf{X}$  that can be communicated  
 108 with only  $p$  floats instead of  $p \times q$ , given that all parties know  $\mathbf{v}$ . For the large weight matrices in deep  
 109 learning, this reduction is significant. For a random  $\mathbf{v}$ ,  $\mathcal{C}_{\mathbf{v}}$  is a random projection, while for  $\mathbf{v}$  being  
 110 the top right singular vector,  $\mathcal{C}_{\mathbf{v}}(\mathbf{X})$  is the best rank-1 approximation of  $\mathbf{X}$  in the Frobenius norm.

111 We use the low-rank compressor  $\mathcal{C}_{\mathbf{v}}$  to reduce communication in the gossip part of Eq. (1):

$$\mathbf{X}_i^{(t+1)} := \mathbf{X}_i^{(t)} + \sum_{j \in \mathcal{N}_i} W_{ij} \mathcal{C}_{\mathbf{v}_{ij}}(\mathbf{X}_j^{(t)} - \mathbf{X}_i^{(t)}), \quad (2)$$

112 for a time-varying vector  $\mathbf{v}_{ij}$  shared between each pair of connected workers. Due to linearity,  
 113  $\mathcal{C}_{\mathbf{v}}(\mathbf{X}_j - \mathbf{X}_i) = (\mathbf{X}_j - \mathbf{X}_i)\mathbf{v}\mathbf{v}^\top = (\mathbf{X}_j\mathbf{v} - \mathbf{X}_i\mathbf{v})\mathbf{v}^\top$ . Therefore, the compressed difference can be  
 114 computed jointly by nodes  $i$  and  $j$  without ever communicating the full  $\mathbf{X}_j - \mathbf{X}_i$ . Thus any nodes  $i$   
 115 and  $j$  only need to exchange vectors instead of matrices.

116 The approximation quality of  $\mathcal{C}_{\mathbf{v}}$  depends on the choice of the projection vector  $\mathbf{v}$ , and we leverage  
 117 the mechanism of power iteration to find good ones. Every time ( $k$ ) the compressor  $\mathcal{C}_{\mathbf{v}}$  is used on  
 118 some parameter difference  $\mathbf{D}^{(k)} := \mathbf{X}_j^{(k)} - \mathbf{X}_i^{(k)}$ , we choose  $\mathbf{v}^{(k)}$  based on the previous low-rank  
 119 approximation. Starting with a random initial vector  $\mathbf{v}^{(0)}$ , we use

$$\mathbf{v}^{(2k+1)} := \frac{\mathbf{D}^{(2k)}\mathbf{v}^{(2k)}}{\|\mathbf{D}^{(2k)}\mathbf{v}^{(2k)}\|}, \quad \mathbf{v}^{(2k)} := \frac{\mathbf{D}^{(2k-1)\top}\mathbf{v}^{(2k-1)}}{\|\mathbf{D}^{(2k-1)\top}\mathbf{v}^{(2k-1)}\|}, \quad \forall k \in \mathbb{Z}_{\geq 0}. \quad (3)$$

120 If  $\mathbf{X}_j^{(k)} - \mathbf{X}_i^{(k)}$  changes slowly over time, this procedure approaches power iteration and it finds the  
 121 top eigenvector  $\mathbf{v}$ . This approach empirically leads to better approximations and faster convergence  
 122 than compression with random projections.

123 Algorithm 1 describes how we use PowerGossip for stochastic optimization. Algorithm 2 presents  
 124 the details of our compression scheme.

### 125 4.1 Properties

126 **Linearity.** Due to the linearity of matrix multiplication, we can compute a matrix-vector product  
 127  $(\mathbf{X}_i - \mathbf{X}_j)\mathbf{v}$  with matrices stored on different workers in a distributed fashion as  $(\mathbf{X}_i\mathbf{v}) - (\mathbf{X}_j\mathbf{v})$ . This

---

**Algorithm 1** Decentralized SGD with edge-wise compression

---

```
1: input model parameters  $\mathbf{X}_i^{(0)} \in \mathbb{R}^{p \times q}$  for each node  $i$  out of  $n$ , randomly initialized identically
2: given a symmetric, doubly stochastic, diffusion matrix  $\mathbf{W} \in \mathbb{R}^{N \times N}$ 
3: given a compressor  $\mathcal{C}$  that can approximate  $\mathbf{X}_i - \mathbf{X}_j$  with little communication
4: for each timestep  $t$  at each worker  $i$  do
5:    $\mathbf{G} \leftarrow$  a stochastic gradient  $\nabla f(\mathbf{X}_i^{(t-1)}, \xi_{i,t})$  for mini-batch  $\xi_{i,t}$ 
6:    $\mathbf{X}_i^{(t)} \leftarrow \mathbf{X}_i^{(t-1)} + \sum_{j \in \mathcal{N}_i} W_{ij} \mathcal{C}(\mathbf{X}_j^{(t-1)} - \mathbf{X}_i^{(t-1)}) - \eta \cdot \mathbf{G}$ 
7: end for
```

---

---

**Algorithm 2** Rank-1  $s$ -step PowerGossip compression for Algorithm 1

---

```
1: initialize a projection vector  $\mathbf{v}_{ij} = -\mathbf{v}_{ji} \in \mathbb{R}^q$  for each pair of connected nodes  $i, j$ , initialized
   from an entry-wise standard normal distribution, stored on nodes  $i$  and  $j$ . Initialize  $k \leftarrow 0$ .
2: procedure  $\hat{\mathcal{C}}(\mathbf{X}_j - \mathbf{X}_i)$ 
3:   for  $s$  power iteration steps do
4:     increment  $k \leftarrow k + 1$ 
5:     if  $k \equiv 1 \pmod{2}$  then
6:        $\hat{\mathbf{v}} \leftarrow \frac{\mathbf{v}_{ij}}{\|\mathbf{v}_{ij}\|}$ 
7:        $\mathbf{p}_j \leftarrow \mathbf{X}_j \hat{\mathbf{v}}, \quad \mathbf{p}_i \leftarrow \mathbf{X}_i \hat{\mathbf{v}} \quad \triangleright$  computed on nodes  $i$  and  $j$ 
8:        $\hat{\mathbf{Q}} \leftarrow (\mathbf{p}_j - \mathbf{p}_i) \hat{\mathbf{v}}^\top$ 
9:        $\mathbf{v}_{ij} \leftarrow \mathbf{p}_j - \mathbf{p}_i \quad \triangleright \mathbf{v}_{ij}$  changes between  $\mathbb{R}^p$  and  $\mathbb{R}^q$ 
10:    else
11:      do the same, but with  $\mathbf{X}$  transposed as in Eq. (3).
12:    end if
13:  end for
14:  return the approximation  $\hat{\mathbf{Q}}$ 
15: end procedure
16: note that computations of  $\mathcal{C}(\mathbf{X}_j - \mathbf{X}_i) = -\mathcal{C}(\mathbf{X}_i - \mathbf{X}_j)$  overlap and share communication.
```

---

128 circumvents communication of matrices by sending much smaller vectors instead. By compressing  
129 the differences of the models, we ensure that the models get closer to the average in every step without  
130 the need for additional ‘consensus stepsize’ like prior protocols. In particular, if two workers agree  
131 on the parameters and their difference is 0, then the compressed update will also be 0. This ensures  
132 that consensus is always a fixed-point of our method for arbitrary-strength compressors.

133 **Low-rank compression.** PowerGossip approximates differences between model parameters by  
134 low-rank matrices. The quality of these approximations depends on the power spectra of the  
135 differences. Similar to how top- $k$  compression—which approximates a vector by its top  $k$  coordinate  
136 in absolute value, and zeros otherwise—works best when a few coordinates are much larger than the  
137 rest, low-rank compression can leverage the peaky power spectra found in deep learning (Vogels et al.,  
138 2019; Cho et al., 2019) to maximize information sent per bit. Our experiments in Section 6 confirm  
139 that low-rank compression is competitive with quantization- or sparsification-based approaches, while  
140 keeping our algorithm simple and free of hyperparameters.

141 **Memory and computation complexity.** The linear projection operations in PowerGossip are well  
142 suited for accelerator hardware used in deep learning (Vogels et al., 2019; Cho et al., 2019; Xu et al.,  
143 2020), and are typically even faster than compression based on random sparsification or quantization.  
144 Like in DP-SGD (Lian et al., 2017), this computation and the communication between nodes can be  
145 overlapped with gradient computation. Storing the previous projection vectors  $\mathbf{v}$  requires memory  
146 linear in the number of connections per worker, but these vectors are very small compared to a  
147 full model (0.1–2% of the full model in our experiments). This yields lower memory usage than  
148 competing methods ChocoGossip Koloskova et al. (2019a) and DeepSqueeze Tang et al. (2019).

## 5 Theoretical analysis

### 5.1 Assumptions and setup

**Loss functions.** We make standard assumptions about our loss functions. Note that our analysis covers both functions satisfying (A1), as well as more general non-convex functions which do not.

(A1)  $f_i$  is  $\mu$ -convex for  $\mu \geq 0$  if it satisfies for any  $\mathbf{X}$ , and  $\mathbf{X}^*$  minimizing  $f$

$$\nabla f_i(\mathbf{X}) \circ (\mathbf{X}^* - \mathbf{X}) \leq -\left(f_i(\mathbf{X}) - f_i(\mathbf{X}^*) + \frac{\mu}{2}\|\mathbf{X} - \mathbf{X}^*\|_F^2\right).$$

(A2) We assume  $\{f_i\}$  are  $L$ -smooth and thus satisfy:

$$\|\nabla f_i(\mathbf{X}) - \nabla f_i(\mathbf{Y})\|_F \leq L\|\mathbf{X} - \mathbf{Y}\|_F, \text{ for any } i, \mathbf{X}, \mathbf{Y}.$$

(A3) **Bounded variance:** We assume there exist constants  $\sigma^2$  and  $\zeta^2$  which bound the variance within and across different nodes, i.e. for any  $\mathbf{X}$  we have

$$\mathbb{E}_{\xi_i \sim D_i} \|\nabla f_i(\mathbf{X}, \xi_i) - \nabla f_i(\mathbf{X})\|_F^2 \leq \sigma^2 \quad \text{and} \quad \frac{1}{N} \sum_{i=1}^N \|\nabla f_i(\mathbf{X}) - \nabla f(\mathbf{X})\|_F^2 \leq \zeta^2.$$

Assumption A1 is known as *star-convexity* and is weaker than the usual definition of convexity (Stich & Karimireddy, 2019). While A3 requires both the variance within each node as well as across the nodes be bounded, we allow for heterogeneous (non-iid) data distributions across the nodes.

**Communication network.** We assume that we are given a mixing matrix  $\mathbf{W} \in \mathbb{R}^{n \times n}$  and an underlying communication network over  $n$  nodes ( $[n], E$ ) satisfying (A4):

(A4)  $W_{ij} \neq 0$  only if  $(i, j) \in E$ , and  $\mathbf{W} \in \mathbb{R}^{n \times n}$  is symmetric ( $\mathbf{W}^\top = \mathbf{W}$ ) and doubly stochastic ( $\mathbf{W}\mathbf{1} = \mathbf{1}, \mathbf{1}^\top \mathbf{W} = \mathbf{1}^\top$ ). Further,  $\mathbf{W}^2$  has eigenvalues  $1 = \lambda_1^2 \geq \lambda_w^2 \geq \dots \lambda_n^2$  with **spectral gap**  $\rho := 1 - \lambda_n^2 > 0$ .

Assumption (A4) characterizes the mixing matrix  $\mathbf{W}$  for decentralized optimization and controls the rate of information spread in the network (Lian et al., 2017; Pu & Nedic, 2018). If  $\mathbf{W}$  satisfies (A4) for  $\rho > 0$ , then the underlying communication network is undirected and strongly connected.

**Compression operators.** We introduce a new class of compression operators  $\mathcal{C}(\cdot)$  and assume that every compressor used in Algorithm 1 satisfies (A5):

(A5) We assume that  $\mathcal{C}$  is a  $\delta$ -approximate unbiased **linear projection** operator i.e. for any  $\mathbf{X}$  and  $\mathbf{Y}$ , the following are true for some  $\delta > 0$ :

$$\mathcal{C}(\mathbf{X} + \mathbf{Y}) = \mathcal{C}(\mathbf{X}) + \mathcal{C}(\mathbf{Y}), \quad \mathcal{C}(\mathcal{C}(\mathbf{X})) = \mathcal{C}(\mathbf{X}), \quad \text{and} \quad \mathbb{E}[\mathcal{C}(\mathbf{X})] = \delta \mathbf{X}.$$

Consider a random- $p$  sampler whose  $(i, j)$  element  $[\mathcal{S}_p(\mathbf{X})]_{i,j}$  is  $X_{i,j}$  with probability  $p$  and 0 otherwise. Then  $\mathcal{S}_p(\cdot)$  is a linear projection operator satisfying (A5) with  $\delta = p$ .

For a second example closer to Algorithm 2, consider the following compressor for  $\mathbf{X} \in \mathbb{R}^{p,q}$ :

$$\mathcal{R}(\mathbf{X}) := (\mathbf{X}\mathbf{u})\mathbf{u}^\top \text{ for } \mathbf{u} \sim S^{(q-1)},$$

i.e. we project  $\mathbf{X}$  along  $\mathbf{u}$  which is sampled uniformly from the unit sphere. The operator  $\mathcal{R}(\mathbf{X})$  approximates  $\mathbf{X}$  as a product of two rank-1 matrices  $\mathbf{u}$  and  $\mathbf{X}\mathbf{u}$ . Then,  $\mathcal{R}(\cdot)$  is clearly linear in  $\mathbf{X}$ , is an unbiased projection operator, and satisfies (A5) with  $\delta = \frac{1}{q}$ . We can also approximate  $\mathbf{X}$  by two rank- $k$  matrices as  $\mathcal{R}_k(\mathbf{X}) = (\mathbf{X}\mathbf{U})\mathbf{U}^\top$  for  $\mathbf{U} \in \mathbb{R}^{q \times k}$  being a uniformly sampled orthonormal matrix. Then  $\mathcal{R}_k(\cdot)$  satisfies (A5) with  $\delta = \frac{k}{q}$ . We can also define a left projection operator  $\mathcal{L}(\mathbf{X}) := \mathbf{v}(\mathbf{v}^\top \mathbf{X})$  for  $\mathbf{v} \sim S^{(p-1)}$ . The operator  $\mathcal{L}(\cdot)$  approximates  $\mathbf{X}$  with two rank-1 matrices  $\mathbf{v}$  and  $\mathbf{X}^\top \mathbf{v}$  and satisfies (A5) with  $\delta = \frac{1}{p}$ .

While (A5) defines a specific class of compression operators which are a subset of those considered in (Koloskova et al., 2019b), they can still be of arbitrary approximation quality  $\delta > 0$ .

### 5.2 Convergence rates

We study the rate of consensus as well as convergence of the objective function in stochastic optimization with compressed communication. Our analysis shows that our algorithm is not only simpler than the previous approaches, but also significantly faster. To simplify notation, we will use  $\bar{\cdot}$  to indicate the average across the  $n$  nodes, e.g.  $\bar{\mathbf{X}} := \frac{1}{n} \sum_{i=1}^n \mathbf{X}_i$ .

189 **Compressed consensus.** Suppose that every iteration, each worker  $i$  performs the following update:  
 190

$$\mathbf{X}_i^{(t)} := \mathbf{X}_i^{(t-1)} + \sum_{j \in \mathcal{N}_i} W_{ij} \left( \mathcal{C}_{ij}^{(t)}(\mathbf{X}_j^{(t-1)}) - \mathcal{C}_{ij}^{(t)}(\mathbf{X}_i^{(t-1)}) \right). \quad (4)$$

191 Each edge  $(i, j)$  can use a different compressor  $\mathcal{C}_{ij}^{(t)}$  that can be varied over time. In this update, only  
 192 compressed parameters are communicated.

193 **Theorem I.** Assuming all compressors  $\mathcal{C}_{ij}^{(t)}$  are  $\delta$ -approximate satisfying (A5) and that the mixing  
 194 matrix  $\mathbf{W}$  has spectral gap  $\rho$  as in (A4), then the update (4) achieves consensus at a  $q$ -linear rate:

$$\frac{1}{N} \sum_{i=1}^N \mathbb{E} \|\mathbf{X}_i^{(t)} - \bar{\mathbf{X}}^{(0)}\|_F^2 \leq (1 - \rho\delta) \frac{1}{N} \sum_{i=1}^N \|\mathbf{X}_i^{(t-1)} - \bar{\mathbf{X}}^{(0)}\|_F^2.$$

195 Note that update (4) requires no additional parameters and that our rate is linear in both  $\delta$  and  $\rho$ .  
 196 When  $\delta = 1$ , i.e. with uncompressed messages, the rate in I corresponds to the classical consensus  
 197 rate (e.g. Xiao & Boyd, 2004a). In contrast, (Koloskova et al., 2019b) require a consensus stepsize,  
 198 do not obtain  $q$ -linear rates, and are slower with a rate depending on  $\rho^2\delta$  instead of our  $\rho\delta$ .

199 **Compressed optimization.** Consider the following algorithm where every node  $i$  performs the  
 200 following updates using a sequence of predetermined stepsizes  $\{\eta_t\}$ :

$$\begin{aligned} \mathbf{Y}_i^{(t)} &:= \mathbf{X}_i^{(t-1)} - \eta_t \nabla F_i(\mathbf{X}, \xi_{i,t}) \\ \mathbf{X}_i^{(t)} &:= \mathbf{Y}_i^{(t)} + \sum_{j \in \mathcal{N}_i} W_{ij} (\mathcal{C}_{ij}^{(t)}(\mathbf{Y}_j^{(t)}) - \mathcal{C}_{ij}^{(t)}(\mathbf{Y}_i^{(t)})). \end{aligned} \quad (5)$$

201 This algorithm is like PowerGossip, but it applies the consensus update of (4) after a local gradient  
 202 update rather than simultaneously. Again, the compressors are allowed to vary across edges and  
 203 with time, and only compressed parameters are communicated. After running for  $T$  steps, we will  
 204 randomly pick the final model given some weights  $\{\alpha_t\}$  as

$$\mathbf{X}_i^{\text{out}} := \mathbf{X}_i^{(t)} \text{ with probability proportional to } \alpha_t. \quad (6)$$

205 **Theorem II.** Suppose that assumptions A2–A5 hold at every round of (5). Then, in each of the  
 206 following cases there exist a sequence of stepsizes  $\{\eta_t\}$  and weights  $\{\alpha_t\}$  such that the output  $\bar{\mathbf{X}}^{\text{out}}$   
 207 computed using (5) and (6) is  $\varepsilon$ -accurate.

208 • **Non-convex:**  $\mathbb{E} \|\nabla f(\bar{\mathbf{X}}^{\text{out}})\|^2 \leq \varepsilon$  after

$$T = \mathcal{O} \left( \frac{L\sigma^2}{n\varepsilon^2} + \frac{\sqrt{L}(\zeta + \sigma)}{\rho\delta\varepsilon^{3/2}} + \frac{L}{\rho\delta\varepsilon} \right) \text{ rounds.}$$

209 • **Convex:** If  $\{f_i\}$  are convex and satisfy (A1) with  $\mu = 0$ , then  $\mathbb{E}[f(\bar{\mathbf{X}}^{\text{out}})] \leq \varepsilon$  after

$$T = \mathcal{O} \left( \frac{\sigma^2}{n\varepsilon^2} + \frac{\zeta + \sigma}{\rho\delta\varepsilon^{3/2}} + \frac{L}{\rho\delta\varepsilon} \right) \text{ rounds.}$$

210 • **Strongly-convex:** If  $\{f_i\}$  satisfy (A1) with  $\mu > 0$ , then  $\mathbb{E}[f(\bar{\mathbf{X}}^{\text{out}})] \leq \varepsilon$  after

$$T = \tilde{\mathcal{O}} \left( \frac{\sigma^2}{n\mu\varepsilon} + \frac{\zeta + \sigma}{\rho\delta\mu\sqrt{\varepsilon}} + \frac{L}{\rho\delta\mu} \log\left(\frac{1}{\varepsilon}\right) \right) \text{ rounds.}$$

211 Let us focus on the strongly convex case ignoring logarithmic factors. Theorem II proves that the  
 212 iteration complexity is  $\frac{\sigma^2}{n\mu\varepsilon} + \frac{\zeta + \sigma}{\rho\delta\mu\sqrt{\varepsilon}} + \frac{L}{\rho\delta\mu} \log(\frac{1}{\varepsilon})$ . This can be decomposed into three terms. The  
 213 first stochastic term  $\frac{\sigma^2}{n\mu\varepsilon}$  is independent of both the compression factor  $\delta$  as well as spectral-gap  $\rho$   
 214 implying that these terms do not affect the asymptotic rates. It scales linearly with the number  
 215 of nodes  $n$ . The second term  $\frac{\zeta + \sigma}{\rho\delta\mu\sqrt{\varepsilon}}$  corresponds to the *drift* experienced and is a penalty due to  
 216 computation of gradients at inexact points (Karimireddy et al., 2019a). However, this is asymptotically  
 217 smaller than the stochastic term. Last is the optimization term  $\frac{L}{\rho\delta\mu} \log(\frac{1}{\varepsilon})$ , which is the slowed down  
 218 by a factor of  $\rho\delta$ . If  $\rho\delta = 1$ , this term matches the linear rate of gradient descent on strongly  
 219 convex functions (Nesterov, 2004). In contrast, the optimization term of (Koloskova et al., 2019b) is  
 220 sub-linear. The dependence on  $\rho$  and  $\delta$  is linear in our rates while (Koloskova et al., 2019b) have a  
 221 quadratic dependence on  $\rho$ . With exact communication ( $\delta = 1$ ) we recover the rates of (Koloskova  
 222 et al., 2020).

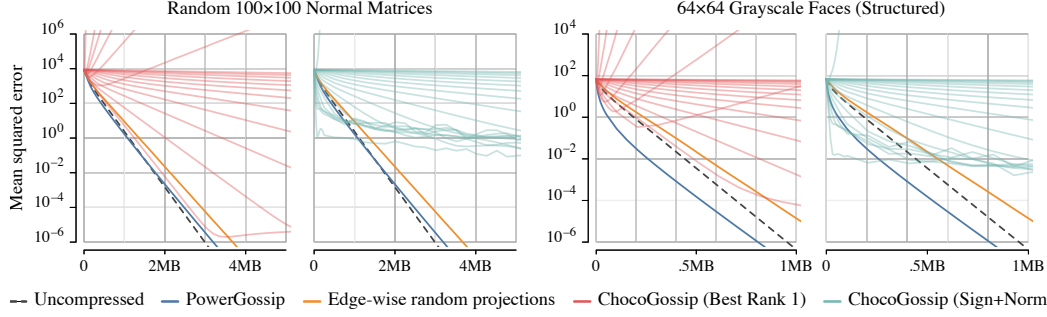

Figure 1: Consensus in an 8-ring. We study the level of consensus achieved as a function of bits transmitted by decentralized averaging. We compare out-of-the-box PowerGossip with power iterations and random projections against ChocoGossip (Koloskova et al., 2019b) with varying diffusion parameters. PowerGossip is competitive to the best tuned instances of ChocoGossip, and can leverage low rank structure in structured data (right).

## 6 Experimental analysis

We study PowerGossip in three settings. We first evaluate bits of communication required to reach **consensus** between 8 workers in a ring through (compressed) gossip averaging. The workers start with personal data matrices  $\mathbf{X}_i$  ( $i = 1 \dots 8$ ) that are either *unstructured*, from a  $100 \times 100$  standard normal distribution, or *structured*, with  $64 \times 64$  images from the Faces Database (AT&T Laboratories Cambridge). Then we evaluate PowerGossip in deep learning. We study the algorithm on the Cifar-10 **image classification** benchmark of Koloskova et al. (2019a), using a ResNet-20 and labeled images that are reshuffled between 8 workers every epoch. We also follow the **language modeling** experiment on WikiText-2 with an LSTM from Vogels et al. (2019) and extend it to a decentralized setting with 16 workers in a ring. Here, the training data is strictly partitioned between workers, dividing the source text equally over the workers in the original ordering.

In all experiments, we tune the hyperparameters of our baselines according to Appendix G and use the same learning rate as uncompressed centralized SGD for all instances of PowerGossip. Further details on the experimental settings are specified in Appendix C.

**Random projections v.s. power iteration.** Power iteration helps PowerGossip to leverage approximate low-rank structure in parameter differences between workers. This is illustrated by the consensus experiments in Figure 1. While on random data no compressed gossip algorithm outperforms full-precision gossip in bits to an arbitrary level of consensus, PowerGossip can reliably use structure in images of faces AT&T Laboratories Cambridge with less communication.

In our deep learning experiments, we also observe that PowerGossip requires less communication than random projections. The table on the right shows that more efficient communication leads to improved test accuracy within a fixed budget of 90 epochs.

| Algorithm                         | Test loss               |
|-----------------------------------|-------------------------|
| PowerGossip w/ Random projections | 4.627 $\leftarrow$ ———— |
| w/ Power iteration                | 4.565 $\leftarrow$ ———— |
| DP-SGD $35\times$ communication   | 4.583 $\leftarrow$ ———— |

**Compression rate.** The compression rate in PowerGossip is determined by the number of power iteration steps per stochastic gradient update. For models with large, square parameter tensors, like our LSTM (Appendix I), a single step of PowerGossip uses less than 0.1% of the bits used by an uncompressed averaging step. For a smaller model like the ResNet-20, the compression ratio is much lower. While our algorithm works for any compression rate, more gradient steps may be required to reach the same accuracy under extreme compression.

In our experiments, we use compression levels similar to those studied in related work. At those levels, PowerGossip achieves test performance similar to uncompressed DP-SGD in the same number of steps. Our compression level is varied through the number of power iterations per gradient update. More power iteration steps speed up consensus at the cost of increased communication in the same way as increasing the rank of the compressor does (see Appendix F), but it requires less memory to store the previous approximation and avoids an expensive orthogonalization step (Vogels et al., 2019). Table 1 shows the effect of varying our compression rate while keeping the number of epochs fixed.

| Algorithm                   | $\eta$  | $\gamma$ | Test loss | Sent/epoch             |
|-----------------------------|---------|----------|-----------|------------------------|
| All-reduce (baseline)       | tuned   |          | 4.46      |                        |
| Uncompressed (DP-SGD)       | tuned   |          | 4.58      | 15.0 GB                |
| PowerGossip (8 iterations)  | default |          | 4.73      | 127 MB (122 $\times$ ) |
| PowerGossip (16 iterations) | default |          | 4.63      | 230 MB (67 $\times$ )  |
| PowerGossip (32 iterations) | default |          | 4.57      | 437 MB (35 $\times$ )  |
| Choco (Sign+Norm)           | tuned   | tuned    | 4.49      | 483 MB (32 $\times$ )  |
| Choco (top-1%)              | tuned   | tuned    | 5.04      | 464 MB (33 $\times$ )  |

Table 1: Test loss achieved within 90 epochs on WikiText-2 language modeling with an LSTM on a 16-ring with strictly partitioned training data. PowerGossip requires no tuning, supports varying levels of compression, and is competitive to tuned ChocoSGD (Koloskova et al., 2019a) at a similar compression rate, matching the test loss of uncompressed DP-SGD.

| Algorithm                  | $\eta$  | $\gamma$ | $\theta$ | Test accuracy | Sent/epoch            |
|----------------------------|---------|----------|----------|---------------|-----------------------|
| All-reduce (baseline)      | tuned   |          |          | 92.3%         |                       |
| Uncompressed (DP-SGD)      | tuned   |          |          | 92.1%         | 102 MB                |
| Choco (top-1%)             | tuned   | tuned    |          | 91.2%         | 3.1 MB (33 $\times$ ) |
| Choco (Sign+Norm)          | tuned   | tuned    |          | 92.0%         | 3.2 MB (32 $\times$ ) |
| Moniqua (2-bit)            | tuned   | tuned    | tuned    | 90.7%         | 6.4 MB (16 $\times$ ) |
| DeepSqueeze (Sign+Norm)    | tuned   | tuned    |          | 91.2%         | 3.2 MB (32 $\times$ ) |
| PowerGossip (1 iteration)  | default |          |          | 91.7%         | 1.8 MB (57 $\times$ ) |
| PowerGossip (2 iterations) | default |          |          | 91.9%         | 3.0 MB (34 $\times$ ) |

Table 2: Test accuracy reached on Cifar-10 within 300 epochs with a ResNet-20 by decentralized optimization algorithms. PowerGossip has no additional hyperparameters and is competitive to all related work at a similar compression rate. Other algorithms used tuned learning rate  $\eta$ , averaging stepsize  $\gamma$ . Moniqua has an additional parameter  $\theta$  that can be computed or tuned.

261 **Hyper-parameter tuning.** In our experiments, we have strictly used the same learning rate tuned  
262 for centralized, uncompressed SGD for all PowerGossip configurations. Tables 1 and 2 show that we  
263 can reach performance competitive to DP-SGD in both tasks, at a similar compression rate to the best  
264 tuned configurations of ChocoSGD (Koloskova et al., 2019b) and DeepSqueeze (Tang et al., 2019).

## 265 7 Conclusion

266 The introduction of communication compression to decentralized learning has come with algorithmic  
267 changes that introduced new hyperparameters required to support arbitrary compression operators.  
268 Focusing on a special class of linear low-rank compression, we presented simple parameter-free  
269 algorithms that perform as well as the extensively tuned alternatives in decentralized learning. Using  
270 power-iterations, this method can leverage the approximate low-rank structure present in deep learning  
271 updates to maximize the information transferred per bit, and reduce the communication between  
272 workers significantly at no loss in quality compared to full-precision decentralized algorithms. This  
273 is achieved with lower memory consumption than current state-of-the-art decentralized optimization  
274 algorithms that use communication compression.

275 Plug-and-play algorithms like PowerGossip can be directly deployed in a decentralized setting while  
276 reusing standard learning rates set in the centralized environment without compression. In view of  
277 the environmental, financial, and productivity impact of hyperparameter tuning in deep learning,  
278 such tuning-free methods are crucial for practical applicability of communication compression in  
279 decentralized machine learning.



## 8 Broader Impact

We believe that the field of decentralized learning plays a key role in translating the recent successes in deep learning from large organizations with large centralized datasets to smaller industry players and individuals. In particular, decentralized and therefore collaborative training on decentralized data is an important building block towards helping to better align each individual’s data ownership and privacy with the resulting utility from jointly trained machine learning models. The ability to train collaboratively on decentralized data may lead to transformative insights in many fields, especially in applications where data is user-provided and privacy sensitive (Nedic, 2020). In addition to privacy, efficiency gains in distributed training reduce the environmental impact of training large machine learning models. The introduction of a practical and reliable communication compression technique is a small step towards achieving these goals on collaborative privacy-preserving and efficient decentralized learning.

## References

- Alistarh, D., Grubic, D., Li, J., Tomioka, R., and Vojnovic, M. QSGD: communication-efficient SGD via gradient quantization and encoding. In *NeurIPS*, pp. 1709–1720, 2017.
- Assran, M., Loizou, N., Ballas, N., and Rabbat, M. Stochastic gradient push for distributed deep learning. In *Proc. ICML*, volume 97 of *Proceedings of Machine Learning Research*, pp. 344–353, 2019.
- AT&T Laboratories Cambridge. AT&T database of faces. URL [https://scikit-learn.org/0.19/datasets/olivetti\\_faces.html](https://scikit-learn.org/0.19/datasets/olivetti_faces.html).
- Bernstein, J., Zhao, J., Azizzadenesheli, K., and Anandkumar, A. signsgd with majority vote is communication efficient and fault tolerant. In *ICLR*, 2019.
- Brown, T. B., Mann, B., Ryder, N., Subbiah, M., Kaplan, J., Dhariwal, P., Neelakantan, A., Shyam, P., Sastry, G., Askell, A., Agarwal, S., Herbert-Voss, A., Krueger, G., Henighan, T., Child, R., Ramesh, A., Ziegler, D. M., Wu, J., Winter, C., Hesse, C., Chen, M., Sigler, E., Litwin, M., Gray, S., Chess, B., Clark, J., Berner, C., McCandlish, S., Radford, A., Sutskever, I., and Amodei, D. Language models are few-shot learners. *CoRR*, abs/2005.14165, 2020.
- Cho, M., Muthusamy, V., Nemanich, B., and Puri, R. GradZip: Gradient compression using alternating matrix factorization for large-scale deep learning, 2019.
- Frankle, J., Schwab, D. J., and Morcos, A. S. The early phase of neural network training. In *ICLR*, 2020.
- Ivkin, N., Rothchild, D., Ullah, E., Braverman, V., Stoica, I., and Arora, R. Communication-efficient distributed SGD with sketching. In *NeurIPS*, pp. 13144–13154, 2019.
- Kairouz, P., McMahan, H. B., Avent, B., Bellet, A., Bennis, M., Bhagoji, A. N., Bonawitz, K., Charles, Z., Cormode, G., Cummings, R., D’Oliveira, R. G. L., Rouayheb, S. E., Evans, D., Gardner, J., Garrett, Z., Gascón, A., Ghazi, B., Gibbons, P. B., Gruteser, M., Harchaoui, Z., He, C., He, L., Huo, Z., Hutchinson, B., Hsu, J., Jaggi, M., Javidi, T., Joshi, G., Khodak, M., Konecný, J., Korolova, A., Koushanfar, F., Koyejo, S., Lepoint, T., Liu, Y., Mittal, P., Mohri, M., Nock, R., Özgür, A., Pagh, R., Raykova, M., Qi, H., Ramage, D., Raskar, R., Song, D., Song, W., Stich, S. U., Sun, Z., Suresh, A. T., Tramèr, F., Vepakomma, P., Wang, J., Xiong, L., Xu, Z., Yang, Q., Yu, F. X., Yu, H., and Zhao, S. Advances and open problems in federated learning. *CoRR*, abs/1912.04977, 2019.
- Karimireddy, S. P., Kale, S., Mohri, M., Reddi, S. J., Stich, S. U., and Suresh, A. T. SCAFFOLD: stochastic controlled averaging for on-device federated learning. *CoRR*, abs/1910.06378, 2019a.
- Karimireddy, S. P., Rebjock, Q., Stich, S. U., and Jaggi, M. Error feedback fixes signsgd and other gradient compression schemes. In *Proc. ICML*, volume 97 of *Proceedings of Machine Learning Research*, pp. 3252–3261, 2019b.
- Koloskova, A., Lin, T., Stich, S. U., and Jaggi, M. Decentralized deep learning with arbitrary communication compression. *CoRR*, abs/1907.09356, 2019a.

328 Koloskova, A., Stich, S. U., and Jaggi, M. Decentralized stochastic optimization and gossip algorithms  
329 with compressed communication. In *Proc. ICML*, volume 97 of *Proceedings of Machine Learning*  
330 *Research*, pp. 3478–3487, 2019b.

331 Koloskova, A., Loizou, N., Boreiri, S., Jaggi, M., and Stich, S. U. A unified theory of decentralized  
332 SGD with changing topology and local updates. *CoRR*, abs/2003.10422, 2020.

333 Lian, X., Zhang, C., Zhang, H., Hsieh, C., Zhang, W., and Liu, J. Can decentralized algorithms  
334 outperform centralized algorithms? A case study for decentralized parallel stochastic gradient  
335 descent. In *NeurIPS*, pp. 5330–5340, 2017.

336 Lin, Y., Han, S., Mao, H., Wang, Y., and Dally, B. Deep gradient compression: Reducing the  
337 communication bandwidth for distributed training. In *ICLR*, 2018.

338 Lu, Y. and Sa, C. D. Moniqua: Modulo quantized communication in decentralized SGD. *CoRR*,  
339 abs/2002.11787, 2020.

340 Nedic, A. Distributed gradient methods for convex machine learning problems in networks: Dis-  
341 tributed optimization. *IEEE Signal Process. Mag.*, 37(3):92–101, 2020.

342 Nedic, A. and Ozdaglar, A. E. Distributed subgradient methods for multi-agent optimization. *IEEE*  
343 *Trans. Automat. Contr.*, 54(1):48–61, 2009.

344 Nesterov, Y. E. *Introductory Lectures on Convex Optimization - A Basic Course*, volume 87 of  
345 *Applied Optimization*. Springer, 2004. ISBN 978-1-4613-4691-3. URL [https://doi.org/10.](https://doi.org/10.1007/978-1-4419-8853-9)  
346 [1007/978-1-4419-8853-9](https://doi.org/10.1007/978-1-4419-8853-9).

347 Pu, S. and Nedic, A. Distributed stochastic gradient tracking methods. *CoRR*, abs/1805.11454, 2018.

348 Rajbhandari, S., Rasley, J., Ruwase, O., and He, Y. Zero: Memory optimization towards training A  
349 trillion parameter models. *CoRR*, abs/1910.02054, 2019.

350 Seide, F., Fu, H., Droppo, J., Li, G., and Yu, D. 1-bit stochastic gradient descent and its application to  
351 data-parallel distributed training of speech dnns. In *INTERSPEECH*, pp. 1058–1062, 2014.

352 Stich, S. U. and Karimireddy, S. P. The error-feedback framework: Better rates for SGD with delayed  
353 gradients and compressed communication. *CoRR*, abs/1909.05350, 2019.

354 Stich, S. U., Cordonnier, J., and Jaggi, M. Sparsified SGD with memory. In *NeurIPS*, pp. 4452–4463,  
355 2018.

356 Tang, H., Gan, S., Zhang, C., Zhang, T., and Liu, J. Communication compression for decentralized  
357 training. In *NeurIPS*, pp. 7663–7673, 2018.

358 Tang, H., Lian, X., Qiu, S., Yuan, L., Zhang, C., Zhang, T., and Liu, J. Deepsqueeze: Parallel stochas-  
359 tic gradient descent with double-pass error-compensated compression. *CoRR*, abs/1907.07346,  
360 2019.

361 Tsitsiklis, J. N. *Problems in decentralized decision making and computation*. PhD thesis, Mas-  
362 sachusetts Institute of Technology, Cambridge, MA, USA, 1984. URL [http://hdl.handle.](http://hdl.handle.net/1721.1/15254)  
363 [net/1721.1/15254](http://hdl.handle.net/1721.1/15254).

364 Vogels, T., Karimireddy, S. P., and Jaggi, M. Powersgd: Practical low-rank gradient compression for  
365 distributed optimization. In *NeurIPS*, pp. 14236–14245, 2019.

366 Wang, H., Sievert, S., Liu, S., Charles, Z. B., Papailiopoulos, D. S., and Wright, S. ATOMO:  
367 communication-efficient learning via atomic sparsification. In *NeurIPS*, pp. 9872–9883, 2018.

368 Wangni, J., Wang, J., Liu, J., and Zhang, T. Gradient sparsification for communication-efficient  
369 distributed optimization. In *NeurIPS*, pp. 1306–1316, 2018.

370 Wen, W., Xu, C., Yan, F., Wu, C., Wang, Y., Chen, Y., and Li, H. Terngrad: Ternary gradients to  
371 reduce communication in distributed deep learning. In *NeurIPS*, pp. 1509–1519, 2017.

- 372 Xiao, L. and Boyd, S. P. Fast linear iterations for distributed averaging. *Syst. Control. Lett.*, 53(1):  
373 65–78, 2004a.
- 374 Xiao, L. and Boyd, S. P. Fast linear iterations for distributed averaging. *Syst. Control. Lett.*, 53(1):  
375 65–78, 2004b.
- 376 Xu, H., Ho, C.-Y., Abdelmoniem, A. M., Dutta, A., Bergou, E. H., Karatsenidis, K., Canini, M.,  
377 and Kalnis, P. Compressed communication for distributed deep learning: Survey and quantitative  
378 evaluation. Technical report, 2020.
- 379 Yu, M., Lin, Z., Narra, K., Li, S., Li, Y., Kim, N. S., Schwing, A. G., Annavaram, M., and Avestimehr,  
380 S. GradiVec: Vector quantization for bandwidth-efficient gradient aggregation in distributed CNN  
381 training. In *NeurIPS*, pp. 5129–5139, 2018.

## 382 A Compressed Consensus (Proof of Theorem I)

383 Recall that the consensus update for each node  $i$  performs (4):

$$\mathbf{X}_i^{(t)} = \mathbf{X}_i^{(t-1)} + \sum_{j \in \mathcal{N}_i} W_{ij} (\mathcal{C}_{ijt}(\mathbf{X}_j^{(t-1)}) - \mathcal{C}_{ijt}(\mathbf{X}_i^{(t-1)})).$$

384 **Lemma 1** (Preserves average). *For every step of (4),  $\bar{\mathbf{X}}^{(t)} = \bar{\mathbf{X}}^{(0)}$ .*

385 *Proof.* Note that for every edge  $(i, j) \in E$ , we add to node  $i$  exactly what is subtracted from node  $j$ .  
386 This preserves the average:

$$\begin{aligned} \bar{\mathbf{X}}^{(t)} &= \frac{1}{n} \sum_{i=1}^n \left( \mathbf{X}_i^{(t-1)} + \sum_{j \in \mathcal{N}_i} W_{ij} (\mathcal{C}_{ijt}(\mathbf{X}_j^{(t-1)}) - \mathcal{C}_{ijt}(\mathbf{X}_i^{(t-1)})) \right) \\ &= \bar{\mathbf{X}}^{(t-1)} + \frac{1}{n} \sum_{(i,j) \in E} \left( W_{ij} (\mathcal{C}_{ijt}(\mathbf{X}_j^{(t-1)}) - \mathcal{C}_{ijt}(\mathbf{X}_i^{(t-1)})) + W_{ji} (\mathcal{C}_{jit}(\mathbf{X}_i^{(t-1)}) - \mathcal{C}_{jit}(\mathbf{X}_j^{(t-1)})) \right) \\ &= \bar{\mathbf{X}}^{(t-1)}. \end{aligned}$$

387 The last equality follows because  $W_{ij} = W_{ji}$  and  $\mathcal{C}_{ijt} = \mathcal{C}_{jit}$ . □

388 **Lemma 2** (Effect of compression). *Assuming (A4) and (A5) hold, the iteration (4) satisfies*

$$\|\Delta_i^{(t)}\|_F^2 \leq (1 - \delta) \|\Delta_i^{(t-1)}\|_F^2 + \delta \left\| \sum_{j \in [N]} W_{ij} \Delta_j^{(t-1)} \right\|_F^2.$$

389 where we define  $\Delta_i^{(t)} := \mathbf{X}_i^{(t)} - \bar{\mathbf{X}}^{(0)}$ .

390 *Proof.* Starting from the consensus update and the fact that  $\sum_j W_{ij} = 1$ , we have

$$\begin{aligned} \mathbf{X}_i^{(t)} &= \mathbf{X}_i^{(t-1)} + \sum_{j \in \mathcal{N}_i} W_{ij} (\mathcal{C}_{ijt}(\mathbf{X}_j^{(t-1)}) - \mathcal{C}_{ijt}(\mathbf{X}_i^{(t-1)})) \\ &= \mathbf{X}_i^{(t-1)} + \sum_{j \in [N]} W_{ij} (\mathcal{C}_{ijt}(\mathbf{X}_j^{(t-1)}) - \mathbf{X}_i^{(t-1)}) \\ &= \mathbf{X}_i^{(t-1)} + \sum_{j \in [N]} W_{ij} \Pi_{ijt} (\mathbf{X}_j^{(t-1)} - \mathbf{X}_i^{(t-1)}). \end{aligned}$$

391 The second equality used  $W_{ij} \neq 0$  only if  $(i, j) \in E$  and the linearity of the compressor. Finally,  
392 since  $\mathcal{C}_{ijt}$  is a linear projection, we can replace it by a projection matrix  $\Pi_{ijt}$ . Recall that  $\mathcal{C}_{ijt}$  is an  
393  $\delta$ -approximate linear projection which implies that  $\Pi_{ijt}$  satisfies

$$\mathbb{E}[\Pi_{ijt}] = \mathbb{E}[\Pi_{ijt}^\top] = \mathbb{E}[\Pi_{ijt}^\top \Pi_{ijt}] = \delta I. \quad (7)$$

394 Further, since  $\Pi_{ijt}$  is a projection matrix, we have for any  $i, j$

$$\begin{aligned} \Pi_{ijt}^\top &\preceq I \\ \Rightarrow \Pi_{ijt}^\top \Pi_{ikt} &\preceq \Pi_{ikt} \\ \Rightarrow \mathbb{E}[\Pi_{ijt}^\top \Pi_{ikt}] &\preceq \mathbb{E}[\Pi_{ikt}] = \delta I. \end{aligned}$$

395 Note that we did not require any sort of independence between the projections  $\Pi_{ijt}^\top \Pi_{ikt}$  in the above  
396 derivation. Armed with these properties of the projection matrices, we turn our attention to the error  
397 term defined as  $\Delta_i^{(t)} := \mathbf{X}_i^{(t)} - \bar{\mathbf{X}}^{(0)}$ . Our previous expression for  $\mathbf{X}_i^{(t)}$  implies that

$$\Delta_i^{(t)} = \Delta_i^{(t-1)} + \sum_{j \in [n]} W_{ij} \Pi_{ijt} (\Delta_j^{(t-1)} - \Delta_i^{(t-1)}).$$

398 Expanding  $\Delta_i^{(t)\top} \Delta_i^{(t)}$  and taking expectations on both sides gives

$$\begin{aligned}
\mathbb{E}[\Delta_i^{(t)\top} \Delta_i^{(t)}] &= \Delta_i^{(t-1)\top} \Delta_i^{(t-1)} + \sum_{j \in [n]} W_{ij} \Delta_i^{(t-1)\top} \mathbb{E}[\Pi_{ijt}] (\Delta_j^{(t-1)} - \Delta_i^{(t-1)}) \\
&\quad + \sum_{j \in [n]} W_{ij} (\Delta_j^{(t-1)} - \Delta_i^{(t-1)})^\top \mathbb{E}[\Pi_{ijt}^\top] \Delta_i^{(t-1)} \\
&\quad + \sum_{j,k \in [n]} W_{ij} W_{ik} (\Delta_j^{(t-1)} - \Delta_i^{(t-1)})^\top \mathbb{E}[\Pi_{ijt}^\top \Pi_{ikt}] (\Delta_k^{(t-1)} - \Delta_i^{(t-1)}) \\
&\preceq \Delta_i^{(t-1)\top} \Delta_i^{(t-1)} + \sum_{j \in [n]} \delta W_{ij} \Delta_i^{(t-1)\top} (\Delta_j^{(t-1)} - \Delta_i^{(t-1)}) \\
&\quad + \sum_{j \in [n]} \delta W_{ij} (\Delta_j^{(t-1)} - \Delta_i^{(t-1)})^\top \Delta_i^{(t-1)} \\
&\quad + \sum_{j,k \in [n]} \delta W_{ij} W_{ik} (\Delta_j^{(t-1)} - \Delta_i^{(t-1)})^\top (\Delta_k^{(t-1)} - \Delta_i^{(t-1)}) \\
&= \Delta_i^{(t-1)\top} \Delta_i^{(t-1)} - \delta \Delta_i^{(t-1)} \Delta_i^{(t-1)\top} + \sum_{j,k \in [n]} \delta W_{ij} W_{jk} \Delta_j^{(t-1)\top} \Delta_k^{(t-1)}.
\end{aligned}$$

399 The second matrix inequality used the fact that if  $A \preceq B$  then  $C^\top A C \preceq C^\top B C$  for any  $C$ . The  
400 equality in the third step pulled out the terms which only depend on  $i$  from the expressions and  
401 used our assumption (A4) that  $\sum_j W_{ij} = \sum_i W_{ij} = 1$ . Taking trace on both sides and using  
402  $\text{Tr}(AB) = \text{Tr}(BA)$  we can simplify the expression as

$$\mathbb{E}[\text{Tr}(\Delta_i^{(t)\top} \Delta_i^{(t)})] \leq (1 - \delta) \text{Tr}(\Delta_i^{(t-1)\top} \Delta_i^{(t-1)}) + \delta \text{Tr}((\sum_{j \in [n]} W_{ij} \Delta_j)^\top (\sum_{j \in [n]} W_{ij} \Delta_j))$$

403 The lemma now follows by the definition of Frobenius norm  $\|Z\|_F^2 = \text{Tr}(Z^\top Z)$ .  $\square$

404 **Lemma 3** (Effect of mixing). *Assuming that  $\mathbf{W}$  has a spectral gap  $\rho$  as in (A4) and  $\Delta_i^{(t)} :=$   
405  $\mathbf{X}_i^{(t)} - \bar{X}^{(0)}$ , we have*

$$\frac{1}{n} \sum_{i \in [n]} \left\| \sum_{j \in [n]} W_{ij} \Delta_j^{(t-1)} \right\|_F^2 \leq (1 - \rho) \frac{1}{n} \sum_{i \in [n]} \|\Delta_i^{(t-1)}\|_F^2.$$

406 *Proof.* Follows from standard mixing arguments such as in (Xiao & Boyd, 2004b).  $\square$

407 Averaging lemma 2 over the nodes  $i$  and then applying Lemma 3 gives

$$\begin{aligned}
\frac{1}{n} \sum_{i \in [n]} \|\Delta_i^{(t)}\|_F^2 &\leq (1 - \delta) \frac{1}{n} \sum_{i \in [n]} \|\Delta_i^{(t-1)}\|_F^2 + \delta \frac{1}{n} \sum_{i \in [n]} \left\| \sum_{j \in [n]} W_{ij} \Delta_j^{(t-1)} \right\|_F^2 \\
&\leq (1 - \delta + \delta(1 - \rho)) \frac{1}{n} \sum_{i \in [n]} \|\Delta_i^{(t-1)}\|_F^2 \\
&= (1 - \rho\delta) \frac{1}{n} \sum_{i \in [n]} \|\Delta_i^{(t-1)}\|_F^2.
\end{aligned}$$

408 This proves the statement of Theorem I.  $\square$

## 409 B Compressed optimization (Proof of Theorem II)

410 We will use two main results proved in the previous section about our consensus step: that the  
411 average is preserved (Lemma 1), and that every step is a contraction in expectation (Theorem I). Any  
412 consensus operator which satisfies these two properties directly ensures convergence of the stochastic  
413 optimization method by the proof technique of (Koloskova et al., 2020). In particular, this shows  
414 that we satisfy Assumption 4 of (Koloskova et al., 2020) with  $p = \rho\delta$ . Replacing  $p$  with  $\rho\delta$  in their  
415 Theorem 2 yields the desired rates.  $\square$

## C Experimental settings

Tables 3, 4 and 5 describe the implementation details of our experiments.

Table 3: Default experimental settings for Cifar-10/ResNet-20 (based on Koloskova et al., 2019a)

|                      |                                                                                                     |
|----------------------|-----------------------------------------------------------------------------------------------------|
| Dataset              | Cifar-10                                                                                            |
| Data augmentation    | random horizontal flip and random $32 \times 32$ cropping                                           |
| Architecture         | ResNet-20                                                                                           |
| Training objective   | cross entropy                                                                                       |
| Evaluation objective | top-1 accuracy                                                                                      |
| Number of workers    | 8                                                                                                   |
| Topology             | ring                                                                                                |
| Network $W_{ij}$     | 0.436 for neighbors $i, j$ , 0.128 if $i = j$ , 0 otherwise<br>(optimized for largest spectral gap) |
| Data                 | reshuffled between workers every epoch                                                              |
| Batch size           | $128 \times$ number of workers                                                                      |
| Momentum             | 0.9                                                                                                 |
| Learning rate        | Tuned. PowerGossip uses the same as uncompressed centralized all-reduce.                            |
| LR decay             | /10 at epoch 150 and 250                                                                            |
| LR warmup            | Step-wise linearly within 5 epochs, starting from 0.1                                               |
| # Epochs             | 300                                                                                                 |
| Weight decay         | $10^{-4}$ , 0 for BatchNorm parameters                                                              |
| Repetitions          | 6, with varying seeds                                                                               |
| Reported metric      | Worst result of any worker of the worker's mean test accuracy over the last 5 epochs                |

Table 4: Default experimental settings for WikiText-2 (based on Vogels et al., 2019)

|                      |                                                                                                                                                          |
|----------------------|----------------------------------------------------------------------------------------------------------------------------------------------------------|
| Dataset              | Word-level WikiText-2                                                                                                                                    |
| Tokenizer            | Spacy                                                                                                                                                    |
| Architecture         | 3-layer LSTM                                                                                                                                             |
| Training objective   | cross entropy                                                                                                                                            |
| Evaluation objective | cross entropy / perplexity                                                                                                                               |
| Number of workers    | 16                                                                                                                                                       |
| Topology             | ring                                                                                                                                                     |
| Network $W_{ij}$     | $\frac{1}{3}$ for neighbors $i, j$ , $\frac{1}{3}$ if $i = j$ , 0 otherwise<br>(common settings, worked better for DPSGD than weights used for Cifar-10) |
| Data                 | Source text strictly divided into 16 equal chunks, always remain on worker                                                                               |
| Batch size           | $64 \times$ number of workers                                                                                                                            |
| Momentum             | 0.0                                                                                                                                                      |
| Learning rate        | Tuned. PowerGossip uses the same as uncompressed centralized all-reduce.                                                                                 |
| LR decay             | /10 at epoch 60 and 80                                                                                                                                   |
| LR warmup            | Step-wise linearly within 5 epochs, starting from 1.25                                                                                                   |
| # Epochs             | 90                                                                                                                                                       |
| Weight decay         | 0.0                                                                                                                                                      |
| Repetitions          | 2                                                                                                                                                        |
| Reported metric      | Worst result of any worker of the worker's mean test cross entropy over the last 5 epochs                                                                |

Table 5: Experimental settings for Consensus

|                   |                                                                                                                       |
|-------------------|-----------------------------------------------------------------------------------------------------------------------|
| Number of workers | 8                                                                                                                     |
| Topology          | ring                                                                                                                  |
| Network $W_{ij}$  | 0.436 for neighbors $i, j$ , 0.128 if $i = j$ , 0 otherwise<br>(optimized for largest spectral gap)                   |
| Data              | 100 $\times$ 100 random normal data<br>or 8 randomly selected $64 \times 64$ faces from (AT&T Laboratories Cambridge) |
| Objective         | minimize $\frac{1}{8} \sum_{i=1}^8 \left( \mathbf{x}_i^{(t)} - \bar{\mathbf{x}}^{(0)} \right)^2$                      |

## D Convergence curves

Below, we plot the convergence curves in terms of test accuracy, as a function of either gradient updates (epochs) or bits sent per worker. In all our experiments, we have used a fixed number of epochs and a learning rate schedule that is common for full precision centralized training. It is possible that experiments with high communication compression would benefit from more epochs or a slightly different learning rate schedule.

## 424 D.1 ResNet-20 on Cifar-10

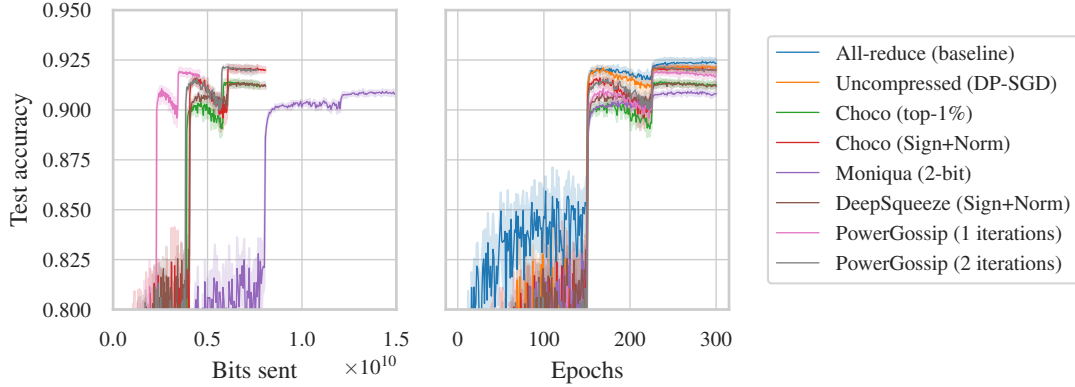

## 426 D.2 LSTM on WikiText-2

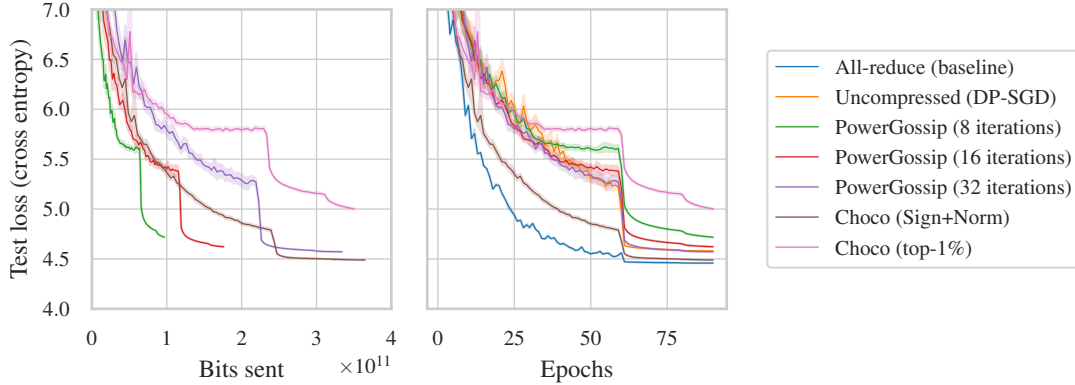

## 428 E The power spectrum of parameter differences

### 429 E.1 LSTM Training

430 The plots below show the power spectra of parameter differences observed while training the LSTM  
 431 (Appendix I). We train with 16 workers connected in a ring, using PowerGossip with 32 power  
 432 iterations per gradient update. During training, we record the power spectra of the differences  
 433 between the parameters of connected workers 0-1, 4-5 and 8-9 at 4 different training stages. Lines  
 434 are averages of the spectra observed between the three worker pairs.

435 The power spectra change significantly over time, but at most stages, they show that a few singular  
 436 vectors carry more weight than others. This structure can be exploited by PowerGossip with power  
 437 iterations. Especially in early training, the power spectra are peaky. This phase has been observed to  
 438 be critical for successful training of non-convex models (Frankle et al., 2020).

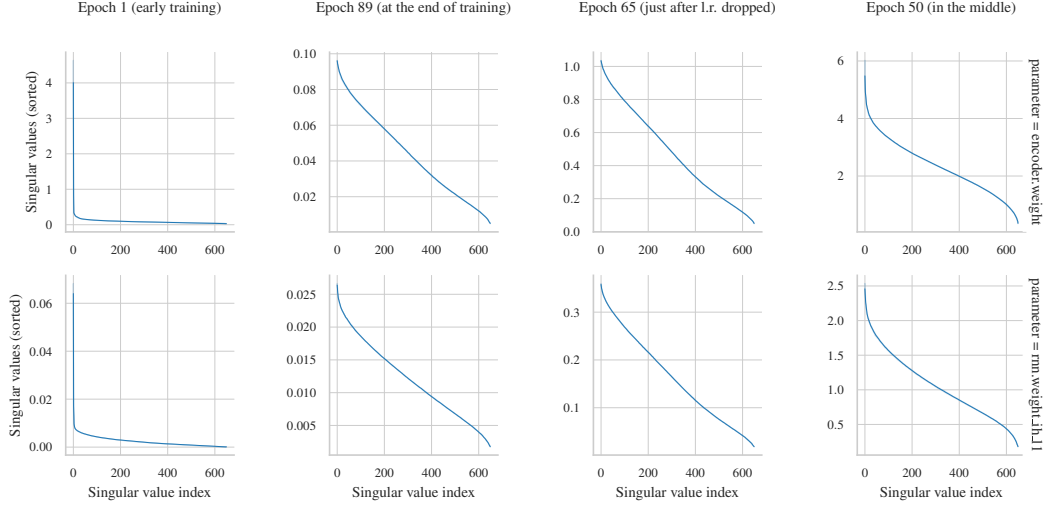

439

## 440 E.2 Consensus

441 The effect of a peaky spectrum on PowerGossip shows in our *consensus* experiments. When we plot  
 442 the spectra of parameter differences between neighboring workers at initialization, we see that faces  
 443 from the Faces Database (AT&T Laboratories Cambridge) can be approximated better with a low-rank  
 444 approximation than random normal matrices. This is the reason why, in Figure 1, PowerGossip with  
 445 power iterations is more efficient per-bit than uncompressed gossip for this dataset.

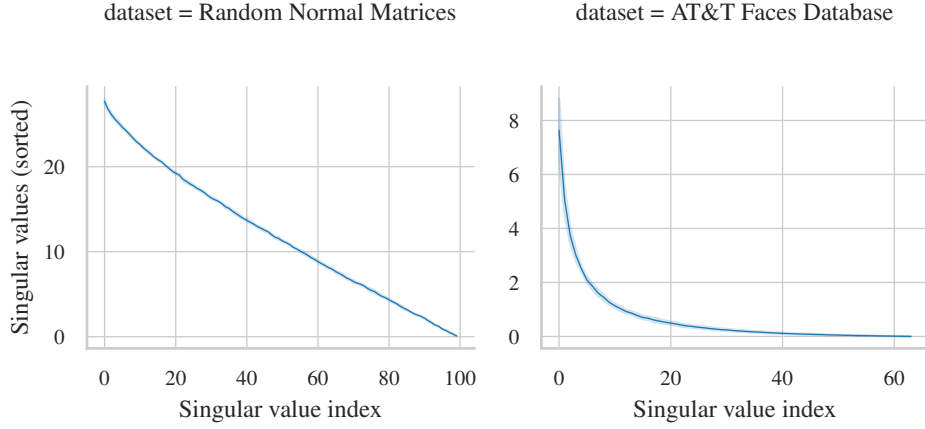

446

## 447 F Changing rank vs changing # power iterations

448 PowerSGD (Vogels et al., 2019), the algorithm on which PowerGossip is inspired, control their  
 449 compression rate by varying the rank of the low-rank approximations. While this strategy is effective  
 450 in terms of quality, it requires their projection matrices to be orthogonalized at every step of power  
 451 iteration, rather than normalized. This operation scales as the square of the approximation rank, and  
 452 is reported to be the most expensive step of the algorithm. A second disadvantage of using a high  
 453 rank is that the memory required to store previous low-rank approximations scales linearly with the  
 454 rank as well.

455 In PowerGossip, we adopt an alternative approach where we use multiple rank-1 power iteration  
 456 steps per gradient update instead of one step with higher accuracy. In the table below, we show that  
 457 this alteration has no impact on the performance of our method, evaluated with a fixed budget of  
 458 90 epochs on WikiText-2 language modeling. For the same total communication budget, we reach  
 459 similar test loss.



| Sent/epoch | PowerGossip rank | Num. power iterations | WikiText-2 test loss |
|------------|------------------|-----------------------|----------------------|
| 127 MB     | 1                | 8                     | 4.73                 |
| 230 MB     | 1                | 16                    | 4.63                 |
| 437 MB     | 1                | 32                    | 4.58                 |
|            | 2                | 16                    | 4.58                 |
|            | 4                | 8                     | 4.58                 |
|            | 8                | 4                     | 4.58                 |

## G Hyperparameters

### G.1 Consensus

In Figure 1, we plot results obtained with two compressors in ChocoGossip Koloskova et al. (2019b), using 20 consensus step size parameters  $\gamma$  ranging from  $7.6 \times 10^{-5}$  to 1 on an exponential grid. The optimal hyperparameter depends on the compressor used.

### G.2 ResNet-20 on Cifar-10

The table below specifies the optimizer-specific hyperparameters that we used in our experiments. For our baselines DeepSqueeze and ChocoSGD, we use tuned hyperparameters from Koloskova et al. (2019a).

| Method                     | Learning rate $\eta$ |      | Consensus rate $\gamma$        |        | Modulo parameter $\theta$ |      |
|----------------------------|----------------------|------|--------------------------------|--------|---------------------------|------|
|                            | Tested               | Used | Tested                         | Used   | Tested                    | Used |
| All-reduce (baseline)      | {0.8, 1.13, 1.6}     | 1.13 |                                |        |                           |      |
| Uncompressed DP-SGD        | {0.8, 1.13, 1.6}     | 1.13 |                                |        |                           |      |
| Choco (top-1%)             | {0.96, 1.2, 1.6}*    | 1.13 | {0.025, 0.0375, 0.075, 0.15}*  | 0.0375 |                           |      |
| Choco (Sign+Norm)          | {1.2, 1.6, 2.4}*     | 1.6  | {0.15, 0.2, 0.45, 1}*          | 0.45   |                           |      |
| Moniqua (2-bit)            | {0.1, 0.2, 0.4, 0.8} | 0.4  | {0.01, 0.005, 0.0025, 0.0012}† | 0.005  | {0.125, 0.25, 0.5}        | 0.25 |
| DeepSqueeze (Sign+Norm)    | {0.24, 0.48, 0.96}   | 0.48 | {0.005, 0.01, 0.05}*           | 0.01   |                           |      |
| PowerGossip (1 iteration)  |                      | 11.3 |                                |        |                           |      |
| PowerGossip (2 iterations) |                      | 11.3 |                                |        |                           |      |

⋆: based on published tuned parameters and the tuning strategy from the authors of ChocoSGD (Koloskova et al., 2019a).

†: the consensus step size was tuned after the other parameters, not in a full grid.

### G.3 LSTM on WikiText-2

The table below specifies the optimizer-specific hyperparameters that we used in our experiments.

| Method                     | Learning rate $\eta$     |      | Consensus rate $\gamma$    |      | Modulo parameter $\theta$ |      |
|----------------------------|--------------------------|------|----------------------------|------|---------------------------|------|
|                            | Tested                   | Used | Tested                     | Used | Tested                    | Used |
| All-reduce (baseline)      | {15, 20, 27.5, 35, 47.5} | 47.5 |                            |      |                           |      |
| Uncompressed DP-SGD        | {15, 20, 27.5, 35, 47.5} | 47.5 |                            |      |                           |      |
| Choco (top-1%)†            | {47.5}                   |      | {0.01, 0.1, 0.2, 0.4, 0.8} |      |                           |      |
| Choco (Sign+Norm)          | {35, 47.5}               | 47.5 | {0.4, 0.6, 0.8, 1.0}       | 0.8  |                           |      |
| PowerGossip (* iterations) |                          | 47.5 |                            |      |                           |      |

†: did not converge. We did not report this result, as more tuning may help.

## H Compared-to algorithm implementations

In the sections below, we describe the implementation details of the algorithms we compare to. We provide the code for our implementations on Github (after deanonimization).

### H.1 ChocoSGD

We implement Algorithm 1 of (Koloskova et al., 2019a), which differs slightly from Algorithm 2 in (Koloskova et al., 2019b), in that it executes consensus steps and gradient updates in parallel like DP-SGD.

We use three compressors in our experiments. As customary, we compress each tensor parameter of our neural networks separately.

- **Sign+Norm**  $Q(\mathbf{x}) = \text{sign}(\mathbf{x}) \cdot \frac{\|\mathbf{x}\|_1}{\text{length}(\mathbf{x})}$ . We confirm the author’s observations that this compressor gives the best and most reliable results.

489 • **top-1%** Let  $p_{99}(\mathbf{x})$  represent the 99th percentile of coordinates in  $\mathbf{x}$  by absolute value. Here

$$Q(\mathbf{x})_i = \mathbf{x}_i \text{ if } \mathbf{x}_i \geq p_{99}(\mathbf{x}), 0 \text{ otherwise.}$$

490 To communicate the top 1% of a vector, we communicate 32-bit float values and 64-bit integer  
491 indices, following the authors.

492 • **SVD** This low-rank compressor has not been used with ChocoSGD, but we have evaluated  
493 it because our proposed method is also based on low-rank compression. This compressor  
494 represents a matrix  $X$  by  $(X\mathbf{v})\mathbf{v}^\top$ , where  $\mathbf{v}$  is the (normalized) top right singular vector found  
495 by a Singular Value Decomposition (SVD).

## 496 H.2 DeepSqueeze

497 We implement DeepSqueeze according to Algorithm 1 in (Tang et al., 2019), and use the same  
498 compressors described for ChocoSGD above.

## 499 H.3 Moniqua

500 Because the 1-bit version of Moniqua (Lu & Sa, 2020) is derived from the 2-bit version with  
501 added BZIP compression, we focus on the 2-bit version. We implement the algorithm according  
502 to Algorithm 1 in (Lu & Sa, 2020). We use the same step size schedule  $\{\alpha_k\}$  as for the optimizers  
503 we evaluated, and tune the a priori bound  $\theta$  as a global constant, as suggested by the authors. As  
504 a stochastic rounding operator  $\mathcal{Q}$ , we quantize stochastically in an unbiased fashion to the points  
505  $\{-\frac{1}{2}, -\frac{1}{6}, \frac{1}{6}, \frac{1}{2}\}$ . This yields  $\delta = \frac{1}{3}$ . Note that the modulo operator ‘mod  $B_\theta$ ’ in the algorithm yields  
506 values between  $-\frac{1}{2}B_\theta$  and  $\frac{1}{2}B_\theta$ .

## 507 I Parameters in architectures

508 See Table 6 and Table 7 for an overview of parameters in the models used.

Table 6: Parameters in the ResNet20 architecture and their shapes. The table shows the per-tensor compression ratio achieved by rank-1 PowerGossip with  $r$  iterations.

| Parameter             | Parameter shape                  | Matrix shape    | Uncompressed | Compression    |
|-----------------------|----------------------------------|-----------------|--------------|----------------|
| layer3.1.conv1        | $64 \times 64 \times 3 \times 3$ | $64 \times 576$ | 144 KB       | $115/r \times$ |
| layer3.2.conv1        | $64 \times 64 \times 3 \times 3$ | $64 \times 576$ | 144 KB       | $115/r \times$ |
| layer3.0.conv2        | $64 \times 64 \times 3 \times 3$ | $64 \times 576$ | 144 KB       | $115/r \times$ |
| layer3.1.conv2        | $64 \times 64 \times 3 \times 3$ | $64 \times 576$ | 144 KB       | $115/r \times$ |
| layer3.2.conv2        | $64 \times 64 \times 3 \times 3$ | $64 \times 576$ | 144 KB       | $115/r \times$ |
| layer3.0.conv1        | $64 \times 32 \times 3 \times 3$ | $64 \times 288$ | 72 KB        | $105/r \times$ |
| layer2.2.conv2        | $32 \times 32 \times 3 \times 3$ | $32 \times 288$ | 36 KB        | $58/r \times$  |
| layer2.1.conv1        | $32 \times 32 \times 3 \times 3$ | $32 \times 288$ | 36 KB        | $58/r \times$  |
| layer2.0.conv2        | $32 \times 32 \times 3 \times 3$ | $32 \times 288$ | 36 KB        | $58/r \times$  |
| layer2.1.conv2        | $32 \times 32 \times 3 \times 3$ | $32 \times 288$ | 36 KB        | $58/r \times$  |
| layer2.2.conv1        | $32 \times 32 \times 3 \times 3$ | $32 \times 288$ | 36 KB        | $58/r \times$  |
| layer2.0.conv1        | $32 \times 16 \times 3 \times 3$ | $32 \times 144$ | 18 KB        | $52/r \times$  |
| layer1.1.conv1        | $16 \times 16 \times 3 \times 3$ | $16 \times 144$ | 9 KB         | $29/r \times$  |
| layer1.1.conv2        | $16 \times 16 \times 3 \times 3$ | $16 \times 144$ | 9 KB         | $29/r \times$  |
| layer1.0.conv2        | $16 \times 16 \times 3 \times 3$ | $16 \times 144$ | 9 KB         | $29/r \times$  |
| layer1.2.conv1        | $16 \times 16 \times 3 \times 3$ | $16 \times 144$ | 9 KB         | $29/r \times$  |
| layer1.0.conv1        | $16 \times 16 \times 3 \times 3$ | $16 \times 144$ | 9 KB         | $29/r \times$  |
| layer1.2.conv2        | $16 \times 16 \times 3 \times 3$ | $16 \times 144$ | 9 KB         | $29/r \times$  |
| layer3.0.downsample.0 | $64 \times 32 \times 1 \times 1$ | $64 \times 32$  | 8 KB         | $43/r \times$  |
| fc                    | $10 \times 64$                   | $10 \times 64$  | 2 KB         | $17/r \times$  |
| layer2.0.downsample.0 | $32 \times 16 \times 1 \times 1$ | $32 \times 16$  | 2 KB         | $21/r \times$  |
| conv1                 | $16 \times 3 \times 3 \times 3$  | $16 \times 27$  | 2 KB         | $20/r \times$  |
| Bias vectors (total)  |                                  |                 | 6 KB         | None           |

Table 7: Parameters in the LSTM architecture and their shapes. The table shows the per-tensor compression ratio achieved by rank-1 PowerGossip with  $r$  iterations.

| Parameter            | Parameter shape    | Matrix shape       | Uncompressed | Compression     |
|----------------------|--------------------|--------------------|--------------|-----------------|
| encoder              | $28869 \times 650$ | $28869 \times 650$ | 73300 KB     | $1271/r \times$ |
| rnn-ih-l0            | $2600 \times 650$  | $2600 \times 650$  | 6602 KB      | $1040/r \times$ |
| rnn-hh-l0            | $2600 \times 650$  | $2600 \times 650$  | 6602 KB      | $1040/r \times$ |
| rnn-ih-l1            | $2600 \times 650$  | $2600 \times 650$  | 6602 KB      | $1040/r \times$ |
| rnn-hh-l1            | $2600 \times 650$  | $2600 \times 650$  | 6602 KB      | $1040/r \times$ |
| rnn-ih-l2            | $2600 \times 650$  | $2600 \times 650$  | 6602 KB      | $1040/r \times$ |
| rnn-hh-l2            | $2600 \times 650$  | $2600 \times 650$  | 6602 KB      | $1040/r \times$ |
| Bias vectors (total) |                    |                    | 174 KB       | None            |

## 509 J Experiment runtime and compute infrastructure

510 We have executed our deep learning experiments on Nvidia Tesla K80 GPUs on n1-series virtual  
511 machines on Google Cloud. The algorithms were implemented in PyTorch, and run using a custom  
512 build that includes MPI for decentralized communication. We refer to the supplemental code for  
513 additional details on our runtime environment.

514 For our LSTM experiments with 16 workers, we use 4 GPUs with 4 processes per GPU. The  
515 experiments took approximately 4 hours in this setup.

516 For our Cifar-10 experiments with 8 workers, use 2 GPUs with 4 processes each. Those experiments  
517 took around 1.5 hours.
